# Supplementary material
Source: PubMed Central journal article supplement (PMC8760066)
Supplement: 41380_2021_1219_MOESM3_ESM.pdf [file 41380_2021_1219_MOESM3_ESM.pdf]

## 1 **Supplementary figure legends**

2 **Supplementary Figure 1. Stress-related response distributions.** (a-d, e-h, i-l) Distributions of  
3 responses to emotional distress questions among all respondents. Red circles represent response means.  
4 (m, n, o) Zoomed-in view of the response means shown in panels a-d (m), e-h (n), i-l (o).

5 **Supplementary Figure 2. Categorizing stress-related questions using factor analysis.** (a) Factor  
6 loadings of individual participants' first stress-related responses onto the three main factors inferred  
7 using factor analysis. (b) Correlation matrix showing the correlation between each pair of questions.  
8 The block diagonal structure demonstrates the division into question subsets. To visualize the  
9 correlation more clearly, the ordering of the responses of two questions (marked with an asterisk in the  
10 figure) was reversed (i.e., 'Not at all' = '5' and 'Very largely' = 1) during this analysis, to match the  
11 "valence" of the other questions: "To what extent did you feel confident in dealing with your personal  
12 problems" and "To what extent did you feel things are under your control".

13 **Supplementary Figure 3. Association between gender and stress-related symptoms and coping**  
14 **strategies.** Left: Table includes the number of positive and negative answers for women and men, as  
15 well as the p-values for the association between gender and each stress-related symptom and coping  
16 strategy. Right: Odds Ratio and 95% confidence intervals for female *vs.* male responses on each  
17 variable.

18 **Supplementary Figure 4. Association between age and stress-related symptoms and coping**  
19 **strategies.** Left: Table includes the number of positive and negative answers, as well as the p-values  
20 for the association between age and each stress-related symptom and coping strategy. Right: Mann-  
21 Whitney U and 95% confidence intervals for each variable.

22 **Supplementary Figure 5. Association between city socioeconomic status and stress-related**  
23 **symptoms and coping strategies.** Left: Table includes the number of positive and negative answers,  
24 as well as the p-values for the association between socioeconomic status and each stress-related  
25 symptom and coping strategy. Right: Mann-Whitney U statistic and 95% confidence intervals for each  
26 variable.

27 **Supplementary Figure 6. Response distributions for each employment status subgroup.** (a-e) Left:  
28 response distributions and means for each of the four work-status subgroups. Right: Zoomed-in views  
29 of the four mean responses are shown for clearer comparison.

30

Supp. Figure 1

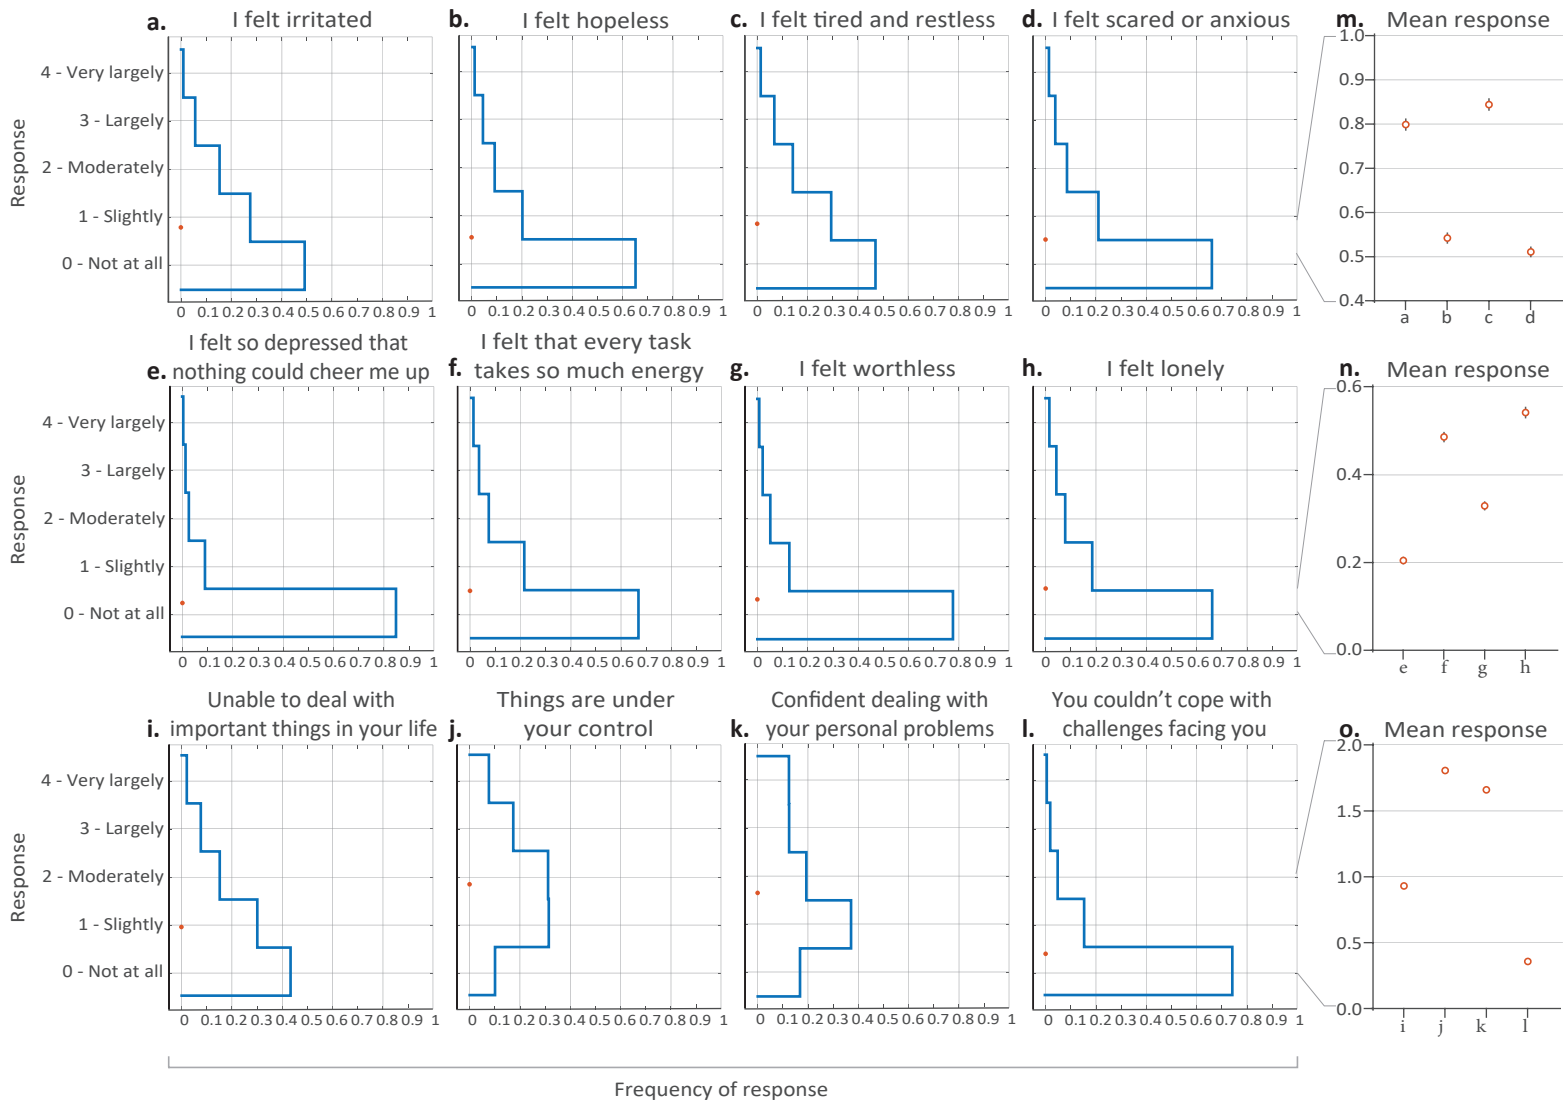

a.

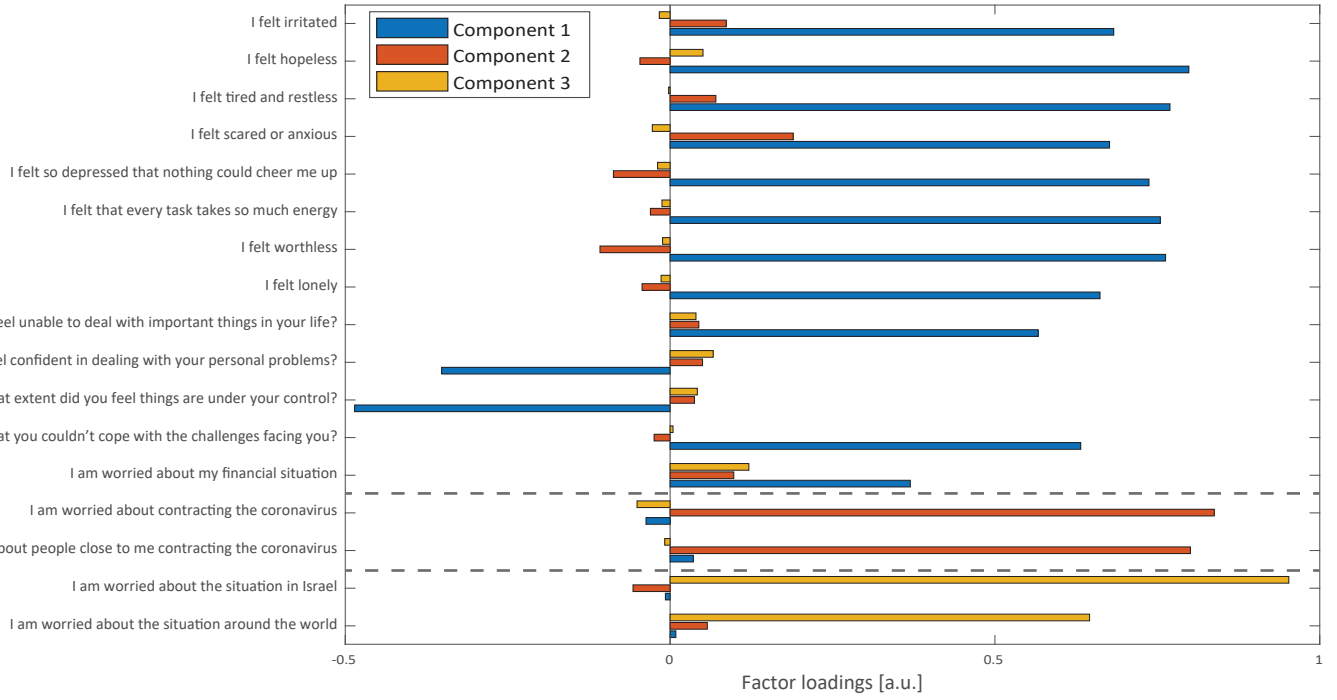

b.

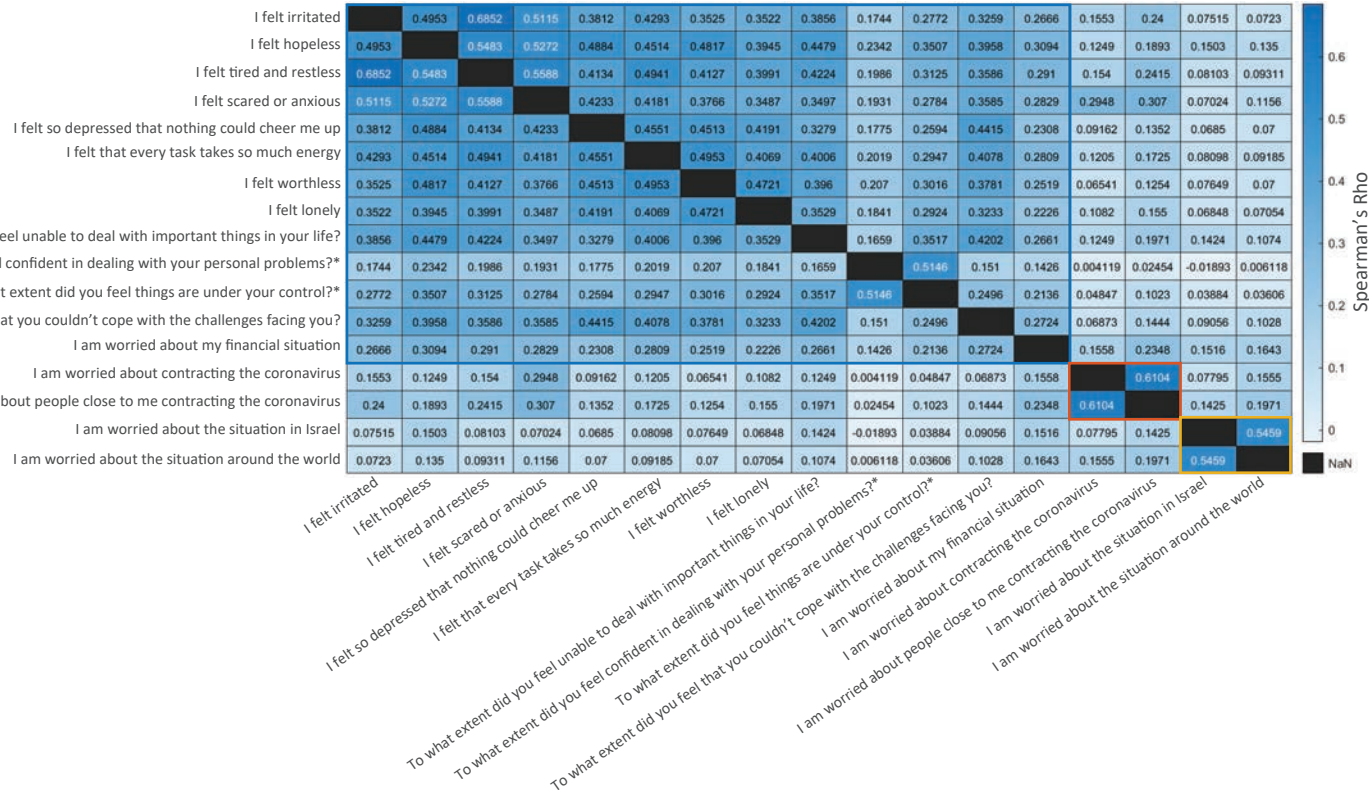

Supp. Figure 3

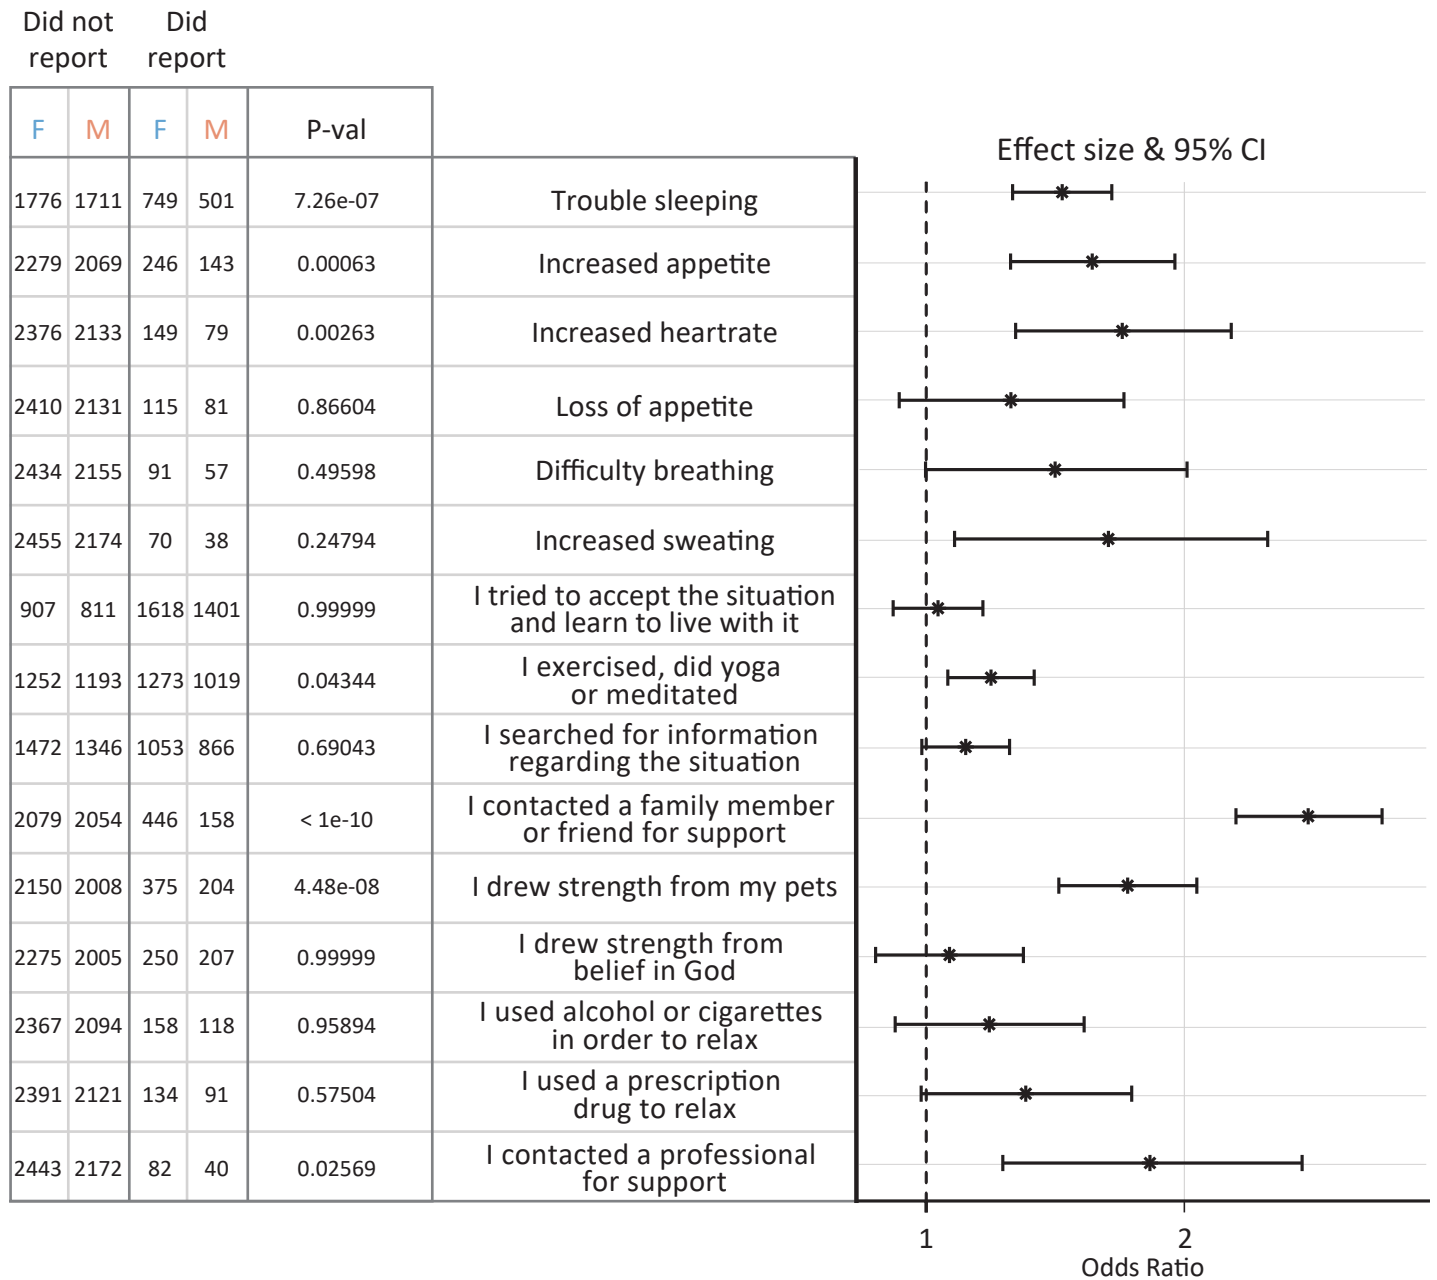

Supp. Figure 4

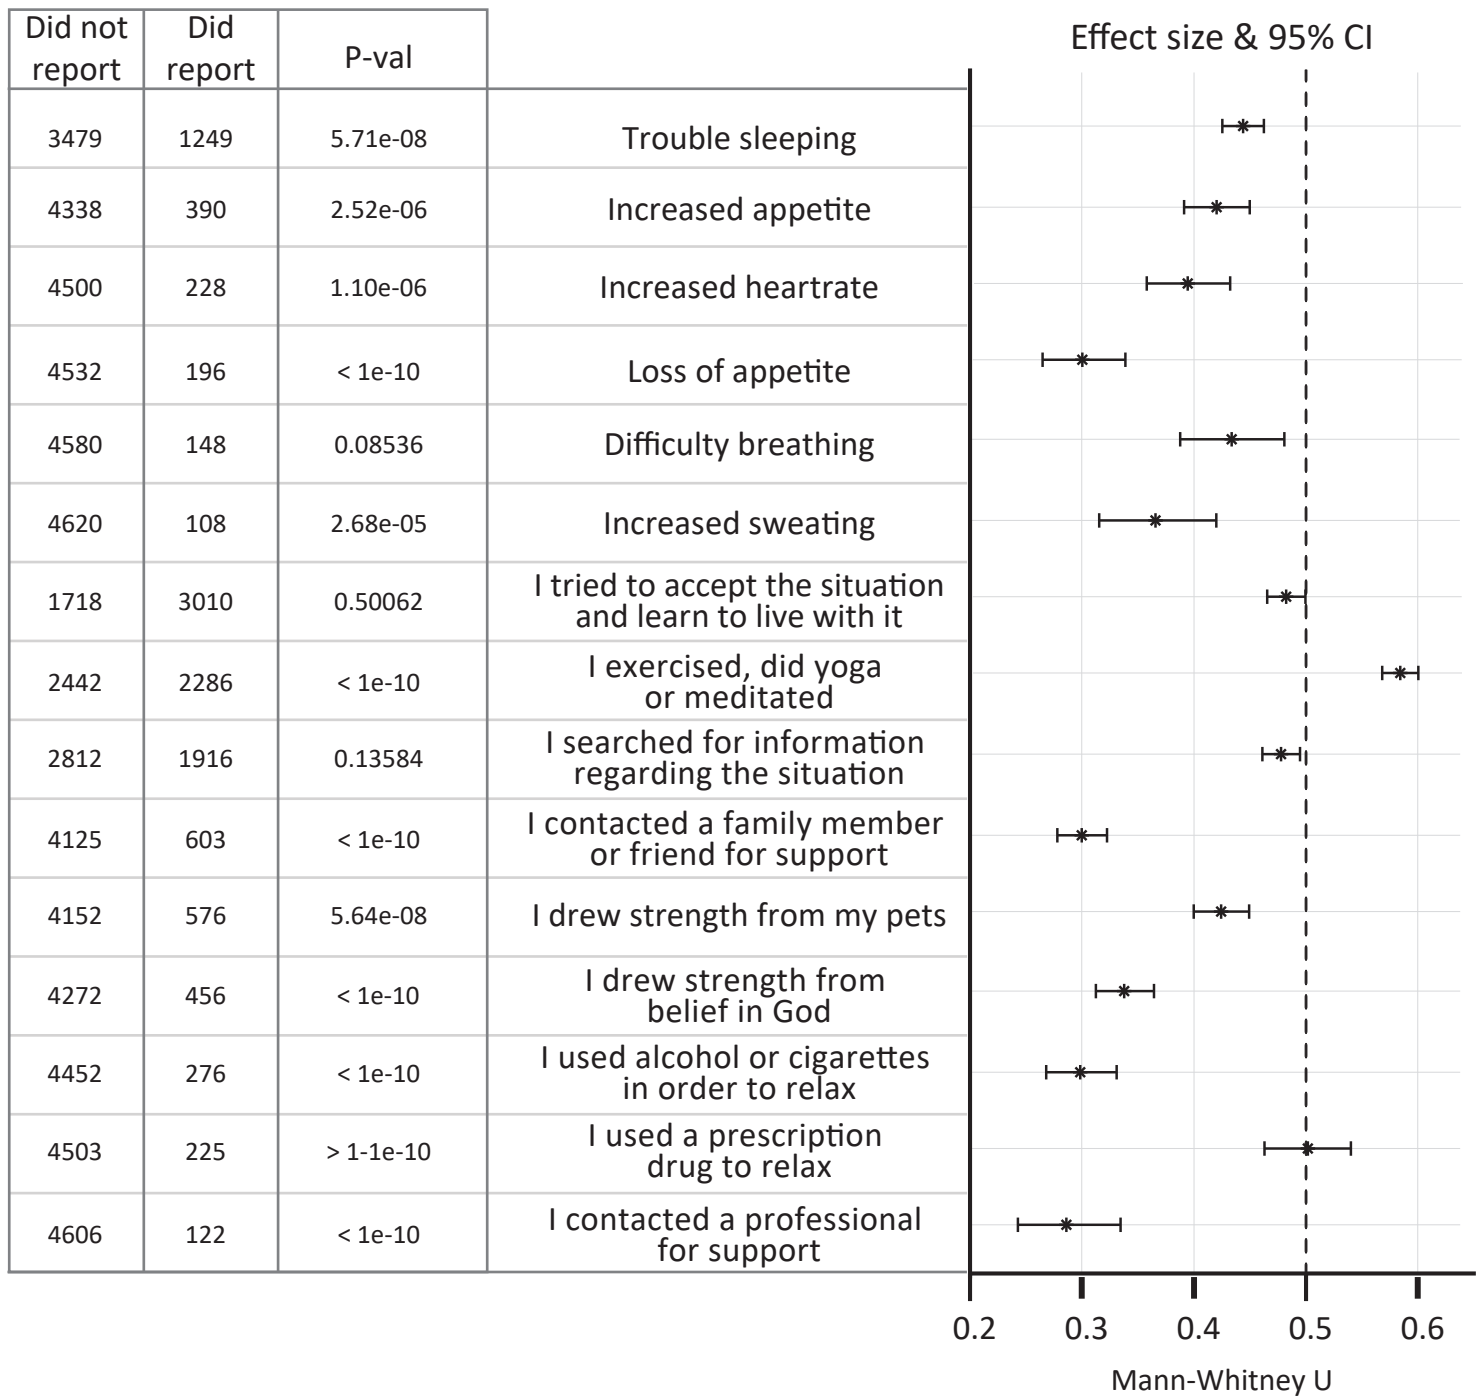

Supp. Figure 5

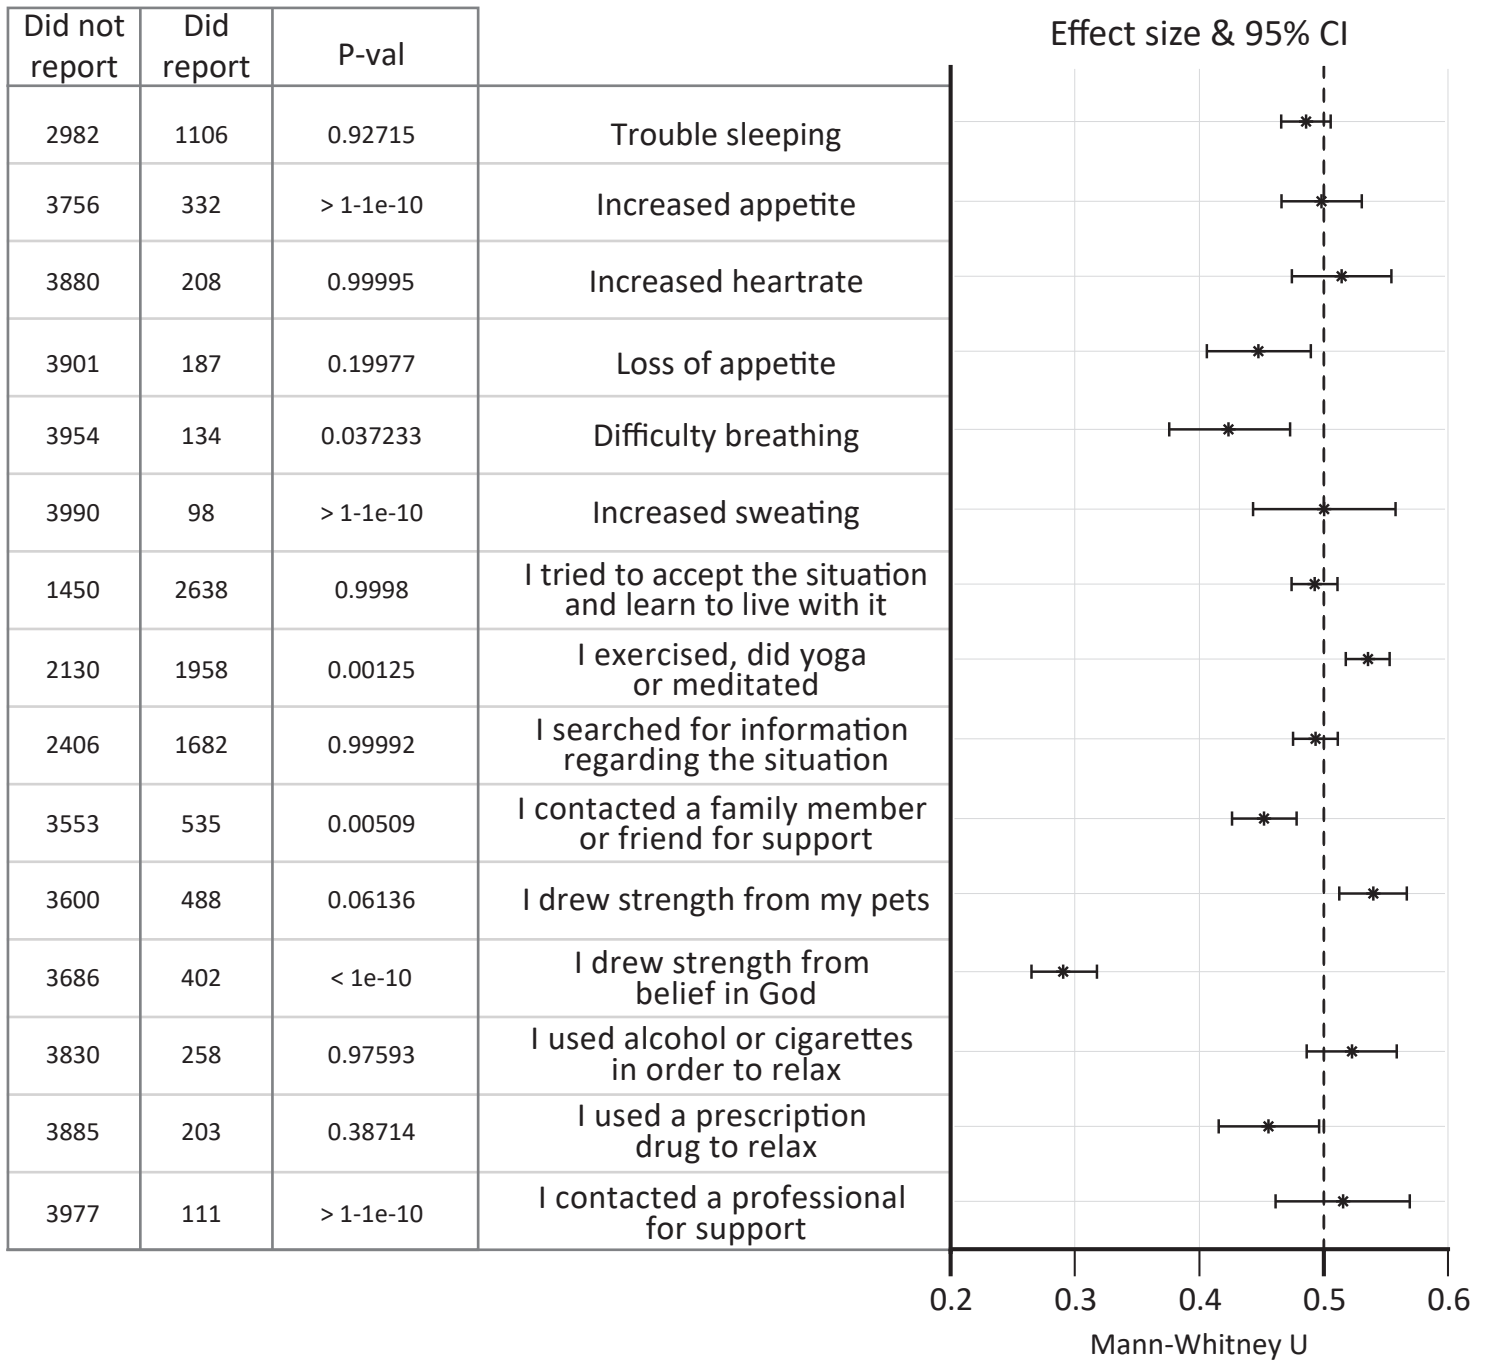

a. FA 1: Emotional distress

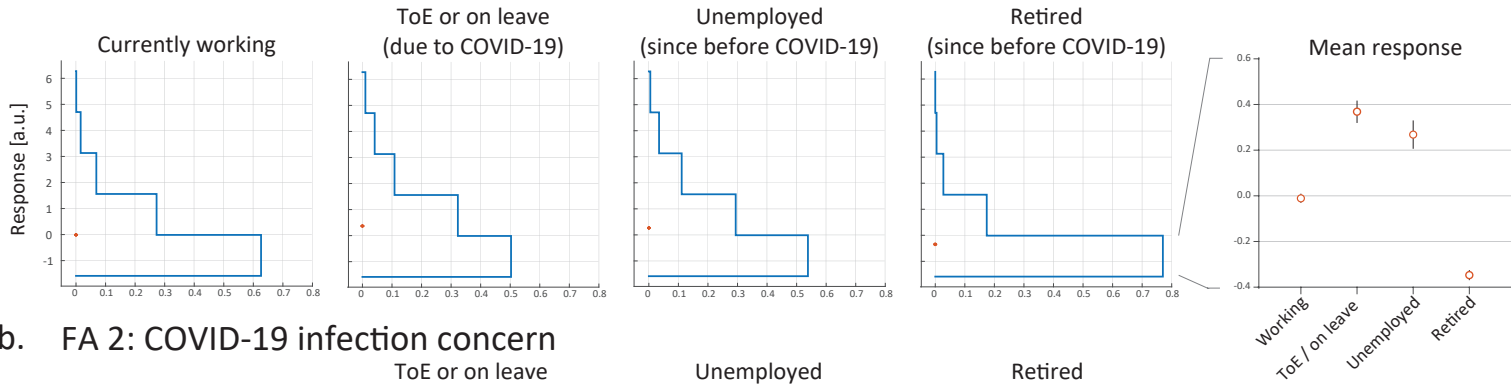

b. FA 2: COVID-19 infection concern

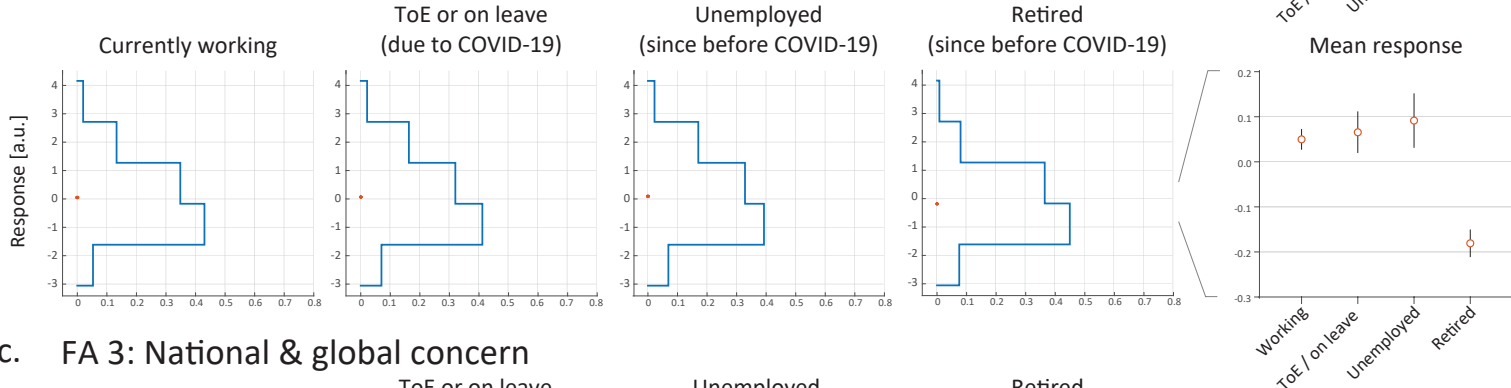

c. FA 3: National & global concern

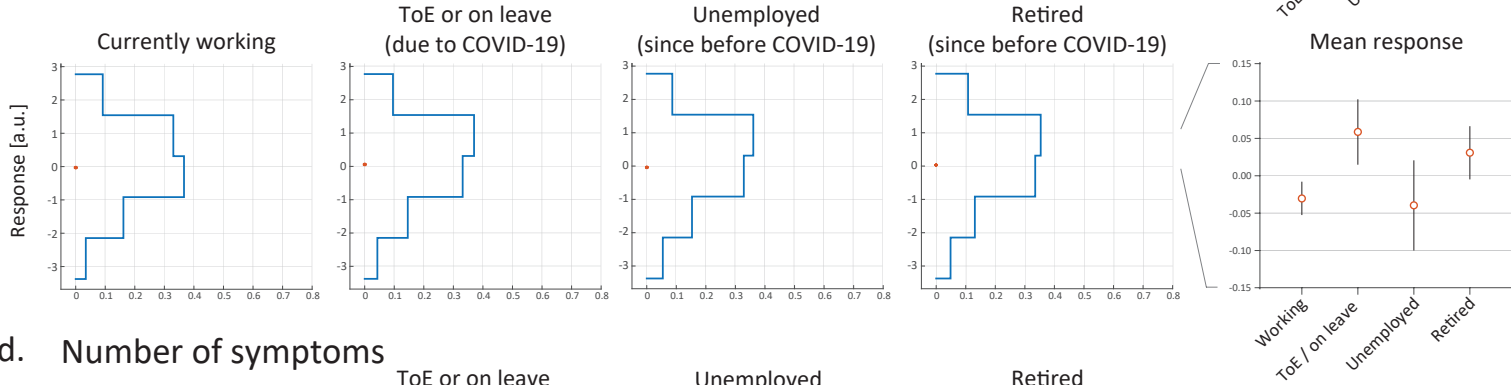

d. Number of symptoms

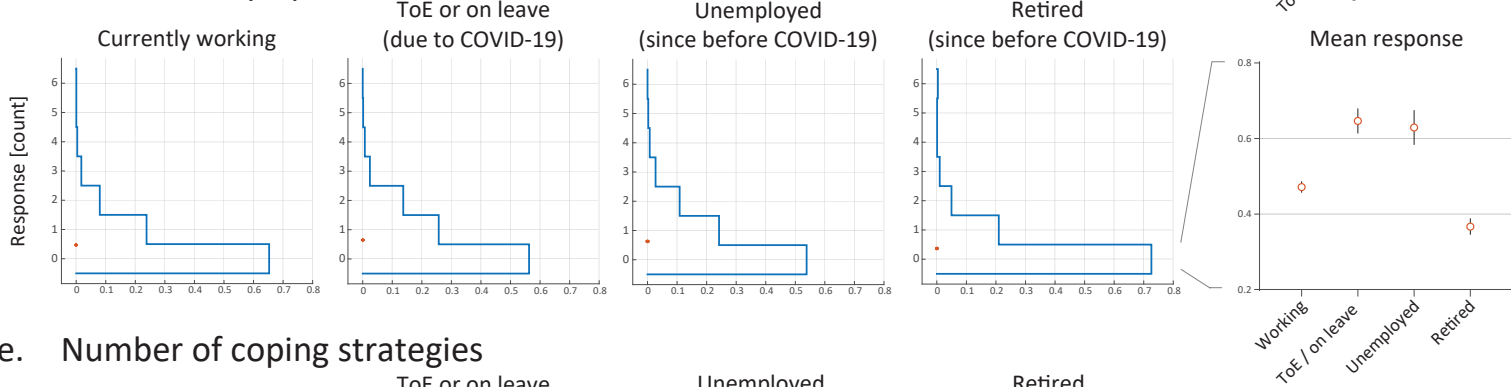

e. Number of coping strategies

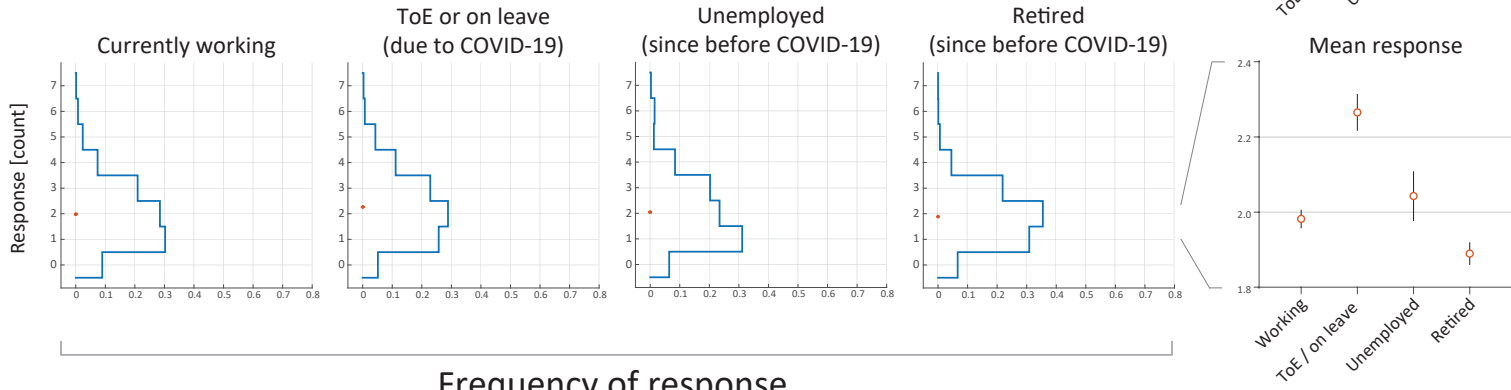

Frequency of response
